# Supplementary material for: Organelle-mimicking liposome dissociates G-quadruplexes and facilitates transcription
Source: PubMed Central journal article supplement (PMC4227800; doi:10.1093/nar/gku998), 2014-10-21
Supplement: supp_gku998_nar-01757-f-2014-File002.pdf [file supp_gku998_nar-01757-f-2014-File002.pdf]

## Organelle-Mimicking Liposome Dissociates G-quadruplexes and Facilitates Transcription

Smritimoy Pramanik,<sup>1</sup> Hisae Tateishi-Karimata,<sup>1</sup> and Naoki Sugimoto<sup>1,2\*</sup>

<sup>1</sup>Frontier Institute for Biomolecular Engineering Research (FIBER), <sup>2</sup>Faculty of Frontiers of Innovative Research in Science and Technology (FIRST), Konan University, 7-1-20 Minatojima-minamimachi, Chuo-ku, Kobe 650-0047, Japan.

- Page S1: Contents.
- Page S2: Supplementary Table 1 for the thermodynamic parameters for the structural formations of mcG<sub>n</sub> G-quadruplexes.
- Page S3: Supplementary Table 2 for the change of thermodynamic parameters for formations of G-quadruplex by 1cG<sub>n</sub>
- Page S4: Supplementary Table 3 for the thermodynamic parameters for the structural formations of 1crG<sub>3</sub> G-quadruplex.
- Page S5: Supplementary Table 4 for the thermodynamic parameters for the structural formations of 1cG<sub>3</sub> G-quadruplexes.
- Page S6: Supplementary Table 5 for the change of thermodynamic parameters for formations of G-quadruplex by 1cG<sub>3</sub>.
- Page S7: Supplementary Figure 1 for schematic representation of the G-quadruplexes.
- Page S8: Supplementary Figures 2 and 3 for the DLS and DSC of liposomes.
- Page S9: Supplementary Figure 4 for the CD spectra and melting profiles of D and G<sub>3</sub>.
- Page S10: Supplementary Figure 5 for the CD spectra and melting profiles of G<sub>2</sub> and G<sub>4</sub>.
- Page S11: Supplementary Figure 6 for the CD spectra and melting profiles of 1cG<sub>2</sub> and 1cG<sub>4</sub>.
- Page S12: Supplementary Figure 6 for the CD spectra of 1cG<sub>n</sub> in the absence and presence of POPC liposome.
- Page S13: Supplementary Figures 8 and 9 for the CD spectra and melting profiles of 1cG<sub>3</sub>.
- Page S14: Supplementary Figure 10 for the melting profiles of 1cG<sub>2</sub> and 1cG<sub>4</sub>.
- Page S15: Supplementary Figure 11 for the CD spectra of 1crG<sub>3</sub> in the absence and presence of POPC liposome.
- Page S16: Supplementary Figure 12 for the melting profiles of 1crG<sub>3</sub>.
- Page S17: Supplementary Figures 13 and S14 for the CD spectra and melting profiles of 2cG<sub>3</sub>, 3cG<sub>3</sub> and 4cG<sub>3</sub>.
- Page S18: Supplementary Figure 15 for the denaturing gel electrophoresis of products of transcription reactions.

**Supplementary Table 1.** Thermodynamic parameters for formation of the G-quadruplex structures by mcG<sub>n</sub><sup>a</sup>

| POPC<br>Concentration (mM) | $\Delta H^\circ$<br>(kcal mol <sup>-1</sup> ) | $T\Delta S^\circ$<br>(kcal mol <sup>-1</sup> ) | $\Delta G^\circ_{25}$<br>(kcal mol <sup>-1</sup> ) | $T_m$<br>(°C) |
|----------------------------|-----------------------------------------------|------------------------------------------------|----------------------------------------------------|---------------|
| <b>1cG<sub>2</sub></b>     |                                               |                                                |                                                    |               |
| 0.0                        | -30.7 ± 0.4                                   | -29.3 ± 0.4                                    | -1.4 ± 0.1                                         | 38.5          |
| 2.0                        | -26.6 ± 0.2                                   | -25.7 ± 0.1                                    | -0.9 ± 0.1                                         | 33.0          |
| <b>1cG<sub>4</sub></b>     |                                               |                                                |                                                    |               |
| 0.0                        | -62.1 ± 0.4                                   | -54.7 ± 0.3                                    | -7.4 ± 0.1                                         | 65.5          |
| 2.0                        | -38.1 ± 0.7                                   | -33.9 ± 0.7                                    | -4.2 ± 0.1                                         | 59.5          |
| <b>2cG<sub>3</sub></b>     |                                               |                                                |                                                    |               |
| 0.0                        | -43.1 ± 0.1                                   | -40.2 ± 0.1                                    | -2.9 ± 0.1                                         | 46.0          |
| 2.0                        | -27.8 ± 0.4                                   | -26.4 ± 0.4                                    | -1.4 ± 0.1                                         | 40.5          |
| <b>3cG<sub>3</sub></b>     |                                               |                                                |                                                    |               |
| 0.0                        | -40.2 ± 0.4                                   | -37.9 ± 0.3                                    | -2.3 ± 0.1                                         | 42.0          |
| 2.0                        | -31.7 ± 0.3                                   | -30.3 ± 0.4                                    | -1.4 ± 0.1                                         | 38.0          |
| <b>4cG<sub>3</sub></b>     |                                               |                                                |                                                    |               |
| 0.0                        | -43.3 ± 0.7                                   | -41.1 ± 0.6                                    | -2.2 ± 0.2                                         | 40.0          |
| 2.0                        | -33.1 ± 0.5                                   | -31.8 ± 0.6                                    | -1.3 ± 0.2                                         | 36.0          |

<sup>a</sup>All experiments were carried out in a buffer containing 10 mM sodium phosphate (pH 7.0), 10 mM NaCl, and 1 mM Na<sub>2</sub>EDTA without or with 2.0 mM POPC. Values are means ± standard deviations from three independent measurements. Melting temperatures were measured at a total strand concentration of 20 μM.

**Supplementary Table 2.** Changes in thermodynamic parameters for formation of G-quadruplex by 1cG<sub>n</sub> (n = 2, 3, and 4) in the presence of 2.0 mM POPC relative to its absence

| <b>G-quadruplex</b> | $\Delta\Delta H^\circ$<br>(kcal mol <sup>-1</sup> ) | $\Delta(T\Delta S^\circ)$<br>(kcal mol <sup>-1</sup> ) | $\Delta\Delta G^\circ_{25}$<br>(kcal mol <sup>-1</sup> ) |
|---------------------|-----------------------------------------------------|--------------------------------------------------------|----------------------------------------------------------|
| 1cG <sub>2</sub>    | +4.1                                                | +3.6                                                   | +0.5                                                     |
| 1cG <sub>3</sub>    | +17.9                                               | +16.0                                                  | +1.9                                                     |
| 1cG <sub>4</sub>    | +24.0                                               | +20.8                                                  | +3.2                                                     |

**Supplementary Table 3.** Thermodynamic parameters for the formation of G-quadruplex structure by 1crG<sub>3</sub><sup>a</sup>

| <b>POPC</b>                         | $\Delta H^\circ$               | $T\Delta S^\circ$              | $\Delta G^\circ_{25}$          | $T_m$       |
|-------------------------------------|--------------------------------|--------------------------------|--------------------------------|-------------|
| <b>Concentration</b><br><b>(mM)</b> | <b>(kcal mol<sup>-1</sup>)</b> | <b>(kcal mol<sup>-1</sup>)</b> | <b>(kcal mol<sup>-1</sup>)</b> | <b>(°C)</b> |
| 0.0                                 | -45.8 ± 0.5                    | -40.6 ± 0.6                    | -5.2 ± 0.1                     | 62.5        |
| 2.0                                 | -23.5 ± 0.4                    | -22.0 ± 0.3                    | -1.5 ± 0.1                     | 54.5        |

<sup>a</sup>All experiments were carried out in a buffer containing 10 mM sodium phosphate (pH 7.0), 10 mM NaCl, and 1 mM Na<sub>2</sub>EDTA without or with 2.0 mM POPC. Values are means ± standard deviations from three independent measurements. Melting temperatures were measured at a total strand concentration of 20 μM.

**Supplementary Table 4.** Thermodynamic parameters for the formation of G-quadruplex structure by 1cG<sub>3</sub><sup>a</sup>

| <b>Liposome<br/>(2.0 mM)</b> | $\Delta H^\circ$<br>(kcal mol <sup>-1</sup> ) | $T\Delta S^\circ$<br>(kcal mol <sup>-1</sup> ) | $\Delta G^\circ_{25}$<br>(kcal mol <sup>-1</sup> ) | $T_m$<br>(°C) |
|------------------------------|-----------------------------------------------|------------------------------------------------|----------------------------------------------------|---------------|
| -                            | -40.0 ± 0.6                                   | -36.9 ± 0.5                                    | -3.1 ± 0.1                                         | 50.0          |
| IM                           | -28.0 ± 0.5                                   | -26.0 ± 0.4                                    | -2.0 ± 0.1                                         | 47.0          |
| NM                           | -24.9 ± 0.8                                   | -23.4 ± 0.3                                    | -1.5 ± 0.1                                         | 45.0          |
| ER                           | -23.1 ± 0.3                                   | -21.7 ± 0.2                                    | -1.4 ± 0.1                                         | 42.5          |

<sup>a</sup>All experiments were carried out in a buffer containing 10 mM sodium phosphate (pH 7.0), 10 mM NaCl, and 1 mM Na<sub>2</sub>EDTA without or with 2.0 mM liposome. Values are means ± standard deviations from three independent measurements. Melting temperatures were measured at a total strand concentration of 20 μM.

**Supplementary Table 5.** Changes of thermodynamic parameters of G-quadruplex formed by 1cG<sub>3</sub> in the presence of IM, NM, and ER mimicking liposomes and POPC liposomes

| <b>Liposome<br/>(2.0 mM)</b> | <b>Molar ratio<br/>of POPC<br/>(%)</b> | <b><math>\Delta\Delta H^\circ</math><br/>(kcal mol<sup>-1</sup>)</b> | <b><math>\Delta(T\Delta S^\circ)</math><br/>(kcal mol<sup>-1</sup>)</b> | <b><math>\Delta\Delta G^\circ_{25}</math><br/>(kcal mol<sup>-1</sup>)</b> |
|------------------------------|----------------------------------------|----------------------------------------------------------------------|-------------------------------------------------------------------------|---------------------------------------------------------------------------|
| IM                           | 43                                     | +12.0                                                                | +10.9                                                                   | +1.1                                                                      |
| NM                           | 69                                     | +15.1                                                                | +13.5                                                                   | +1.6                                                                      |
| ER                           | 75                                     | +16.9                                                                | +15.2                                                                   | +1.7                                                                      |
| POPC                         | 100                                    | +17.9                                                                | +16.0                                                                   | +1.9                                                                      |

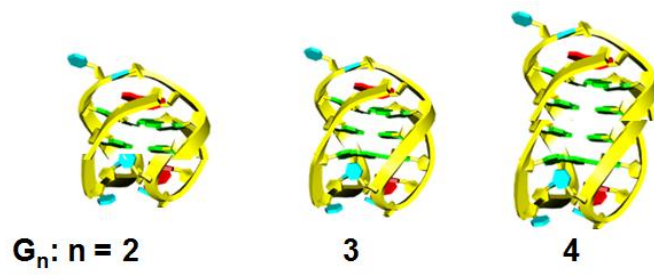

**Supplementary Figure 1.** Schematic representations of  $G_n$  ( $n = 2, 3,$  and  $4$ ) structures.

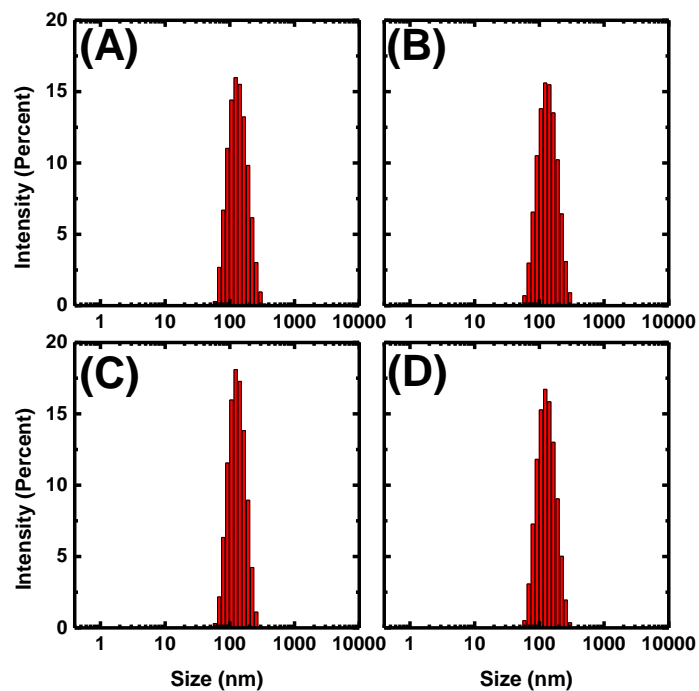

**Supplementary Figure 2.** Diameter distributions of (A) POPC, (B) IM, (C) NM, and (D) ER liposomes at 25 °C.

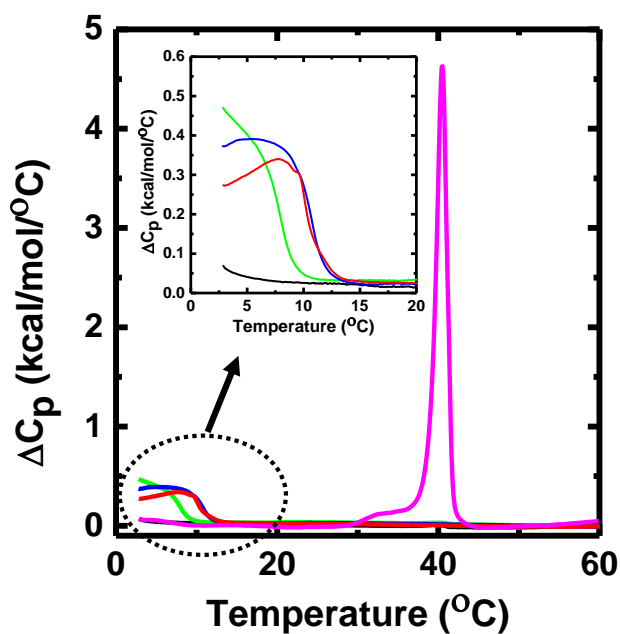

**Supplementary Figure 3.** DSC heating thermograms for POPC (black), IM (red), NM (blue), ER (green), and DPPC (pink) liposomes. The inset shows DSC profiles in the region from 0 to 20 °C.



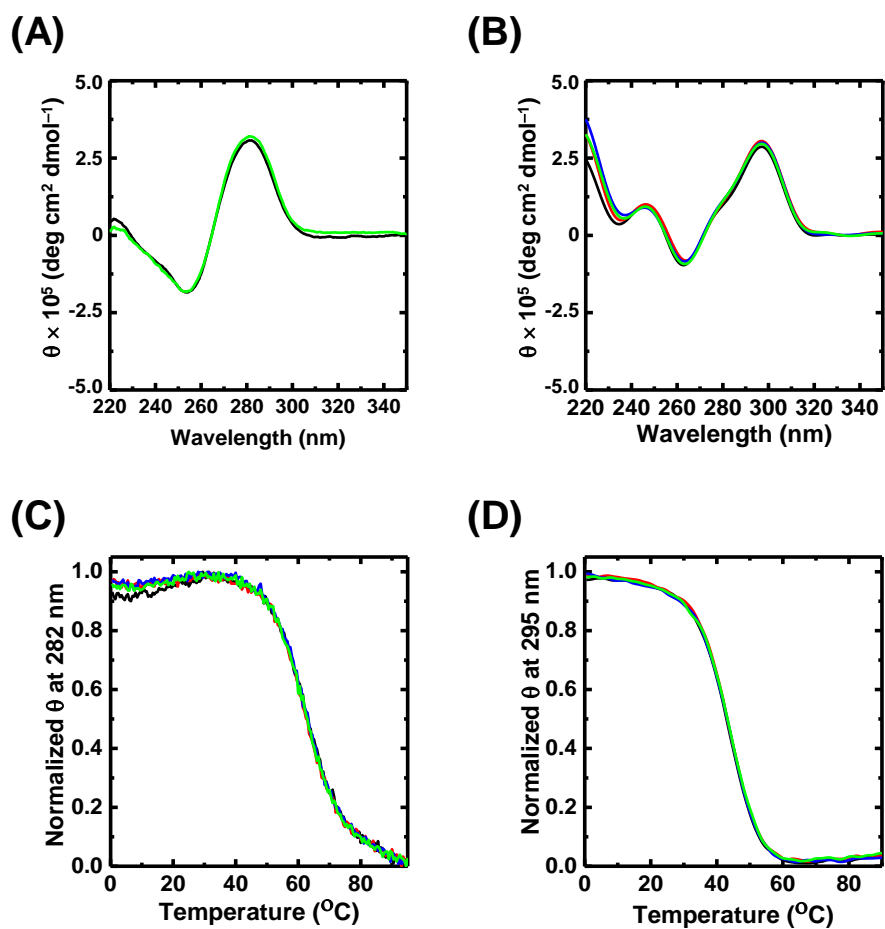

**Supplementary Figure 4.** CD spectra of 20  $\mu\text{M}$  (A) D and (B)  $G_3$  at 4  $^\circ\text{C}$  and normalized CD melting profiles of (C) D at 282 nm and (D)  $G_3$  at 295 nm in the absence (black) and presence of 2.0 mM IM (red), NM (blue), and ER (green) liposomes.

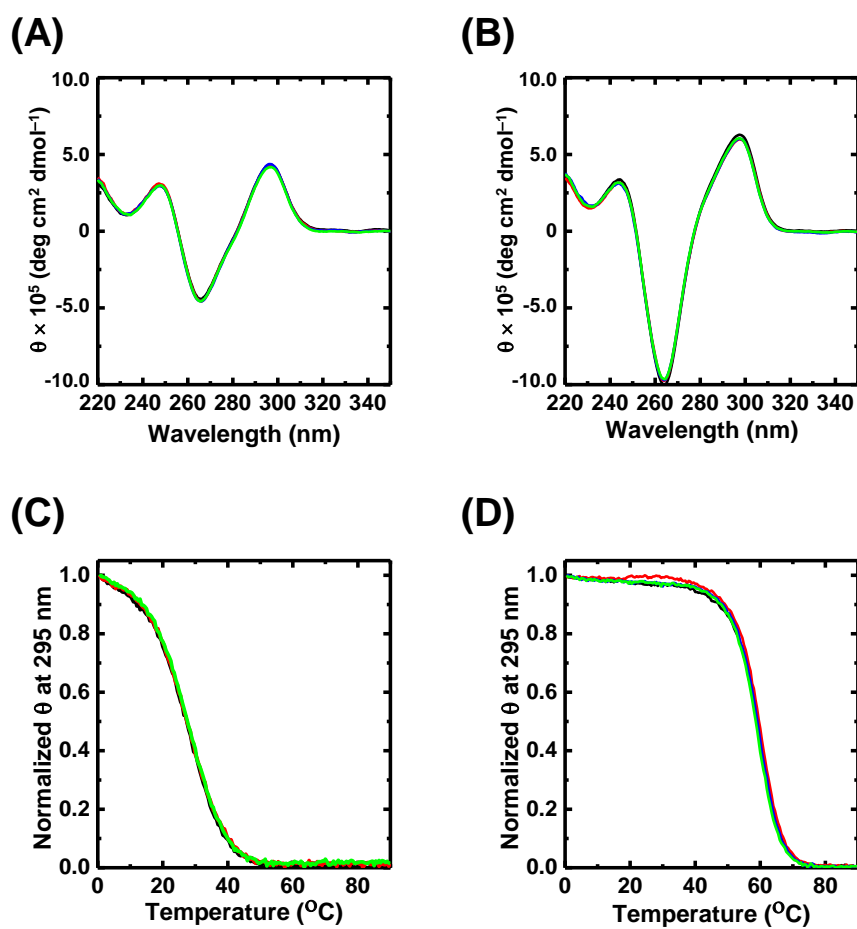

**Supplementary Figure 5.** CD spectra of 20  $\mu$ M (A)  $G_2$  and (B)  $G_4$  at 4 °C and normalized CD melting profiles of (C)  $G_2$  and (D)  $G_4$  at 295 nm in the absence (black) and presence of 2.0 mM IM (red), NM (blue), and ER (green) liposomes.

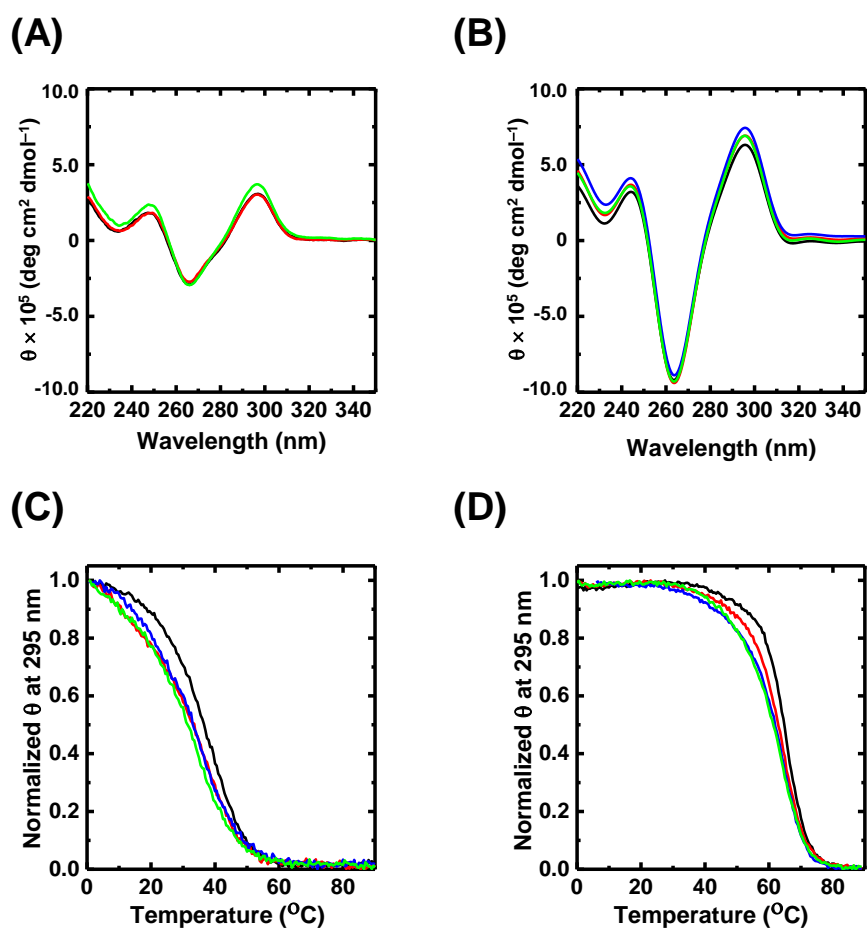

**Supplementary Figure 6.** CD spectra of 20  $\mu$ M (A) 1cG<sub>2</sub> and (B) 1cG<sub>4</sub> at 4 °C and normalized CD melting profiles of (C) 1cG<sub>2</sub> and (D) 1cG<sub>4</sub> at 295 nm in the absence (black) and presence of 2.0 mM IM (red), NM (blue), and ER (green) liposomes.

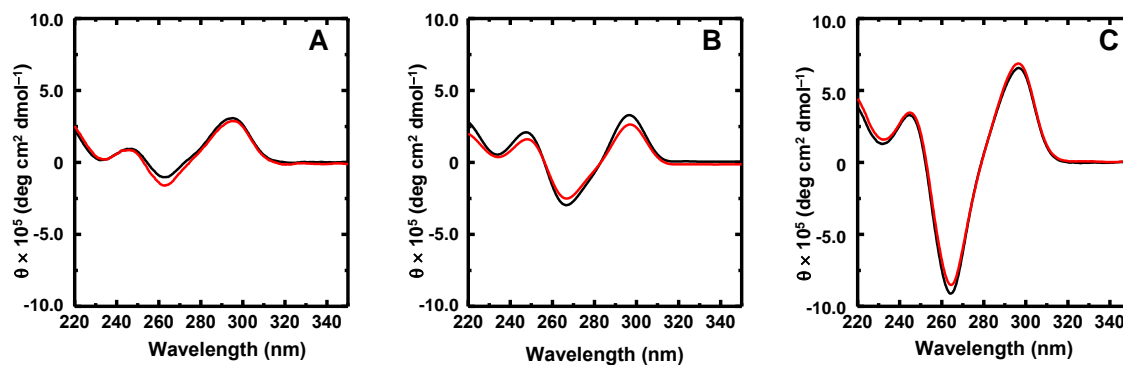

**Supplementary Figure 7.** CD spectra of 20  $\mu\text{M}$  (A) 1cG<sub>3</sub>, (B) 1cG<sub>2</sub>, and (C) 1cG<sub>4</sub> in the absence (black) and presence (red) of 2.0 mM POPC liposomes at 4 °C.

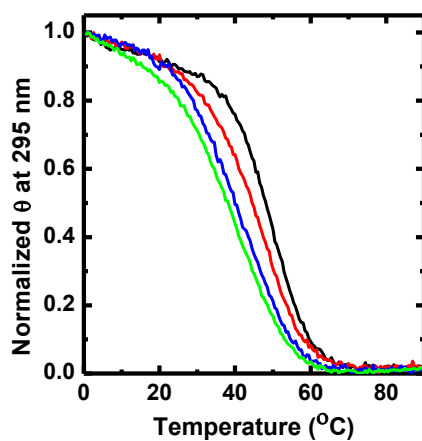

**Supplementary Figure 8.** Normalized CD melting profiles at 295 nm of 20  $\mu\text{M}$  total strand concentration of 1cG<sub>3</sub> in the absence (black) and presence of 0.5 (red), 1.0 (blue), and 2.0 mM (green) POPC liposomes.

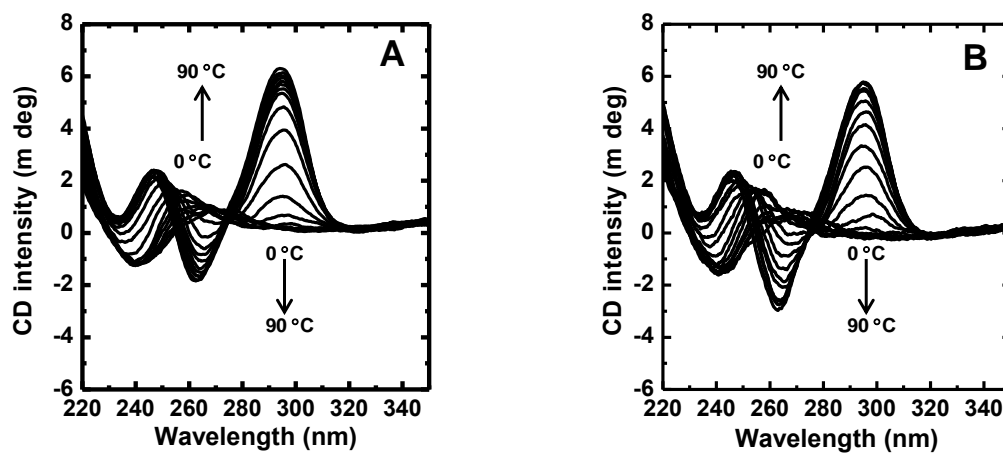

**Supplementary Figure 9.** CD spectra of 20  $\mu\text{M}$  1cG<sub>3</sub> in (A) the absence and (B) presence of 2.0 mM POPC liposomes at temperatures from 0 to 90  $^{\circ}\text{C}$ .

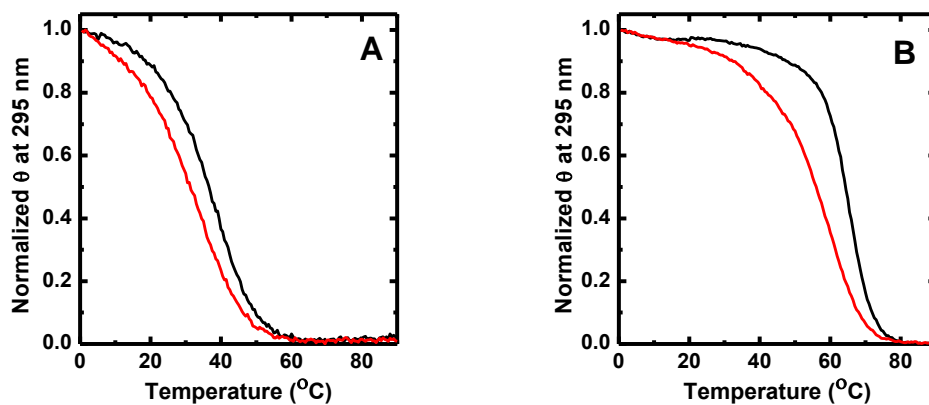

**Supplementary Figure 10.** Normalized CD melting profiles at 295 nm of 20  $\mu$ M total strand concentration of (A) 1cG<sub>2</sub> and (B) 1cG<sub>4</sub> in the absence (black) and presence (red) of 2.0 mM POPC liposomes.

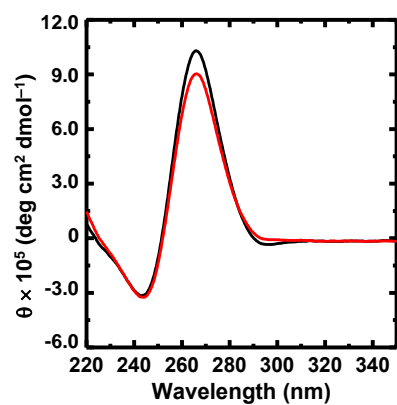

**Supplementary Figure 11.** CD spectra of 20  $\mu\text{M}$  1crG<sub>3</sub> in the absence (black) and presence (red) of 2 mM POPC liposomes at 4 °C.

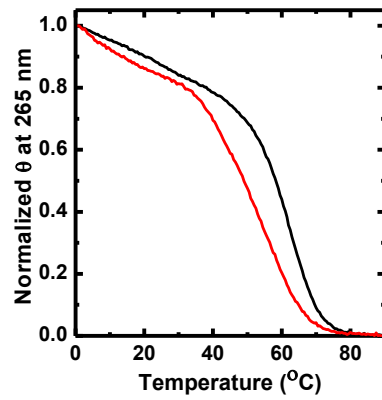

**Supplementary Figure 12.** Normalized CD melting profiles at 265 nm of 20  $\mu\text{M}$  total strand concentration of 1crG<sub>3</sub> in the absence (black) and presence (red) of 2.0 mM POPC liposomes.



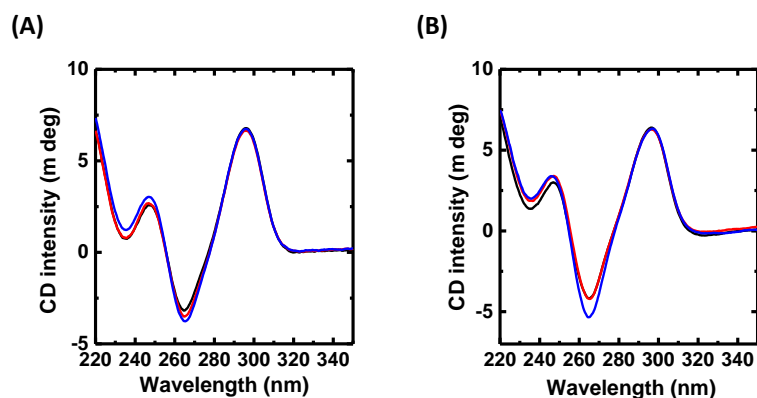

**Supplementary Figure 13.** CD spectra of 20  $\mu\text{M}$  2cG<sub>3</sub> (black), 3cG<sub>3</sub> (red), and 4cG<sub>3</sub> (blue) in (A) absence and (B) presence of 2.0 mM POPC liposomes at 4 °C.

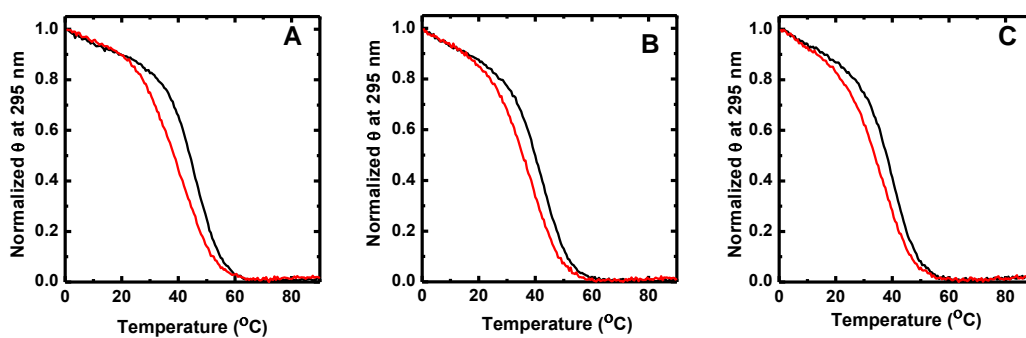

**Supplementary Figure 14.** Normalized CD melting profiles at 295 nm of 20  $\mu\text{M}$  total strand concentration of (A) 2cG<sub>3</sub>, (B) 3cG<sub>3</sub>, and (C) 4cG<sub>3</sub> in the absence (black) and presence (red) of 2.0 mM POPC liposomes.

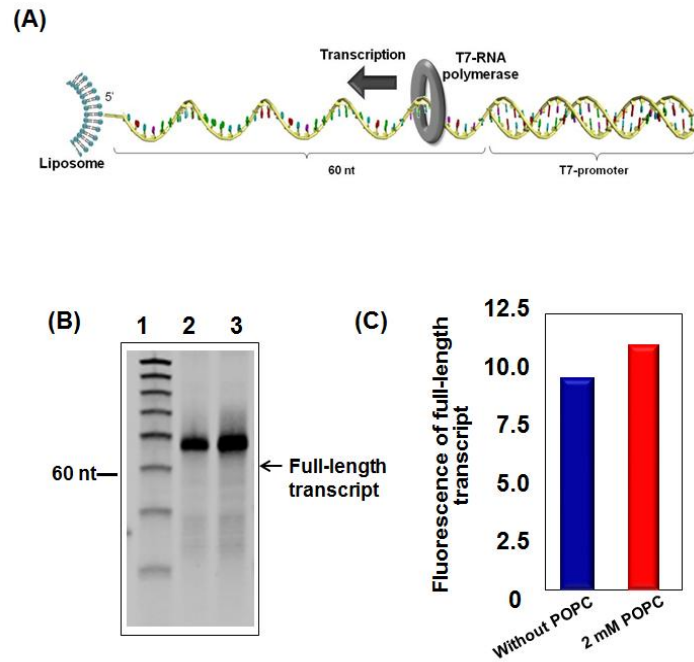

**Supplementary Figure 15.** Effects of membrane surface on transcription of a linear template DNA sequence. (A) Illustration of the template DNA immobilized on a liposome. (B) Denaturing gel electrophoresis of products of transcription reactions performed for 90 min at 37 °C. Reaction mixtures contained 0.3  $\mu$ M T7 polymerase and 1.5  $\mu$ M DNA template in a buffer containing 10 mM NaCl, 40 mM Tris-HCl (pH 8.0), 8 mM MgCl<sub>2</sub> and 2 mM spermidine in the absence and presence of 2.0 mM POPC. Lane 1, size marker; lane 2, transcription products in the absence of POPC; lane 3, transcription products in the presence of 2.0 mM POPC. (C) Comparison of fluorescence intensities of full-length transcripts from gel bands in panel B.
